# Supplementary material
Source: PubMed Central journal article supplement (PMC5377839)
Supplement: JCM.02182-16_zjm999095425s1.pdf [file JCM.02182-16_zjm999095425s1.pdf]

| <b>Table S1</b> Detection of fungi in bacterial culture media versus selective-fungal culture media |                                             |           |
|-----------------------------------------------------------------------------------------------------|---------------------------------------------|-----------|
| Culture media                                                                                       | Number of samples with fungal detection (%) | p-value   |
| <i>Aspergillus</i> (144 positive samples)                                                           |                                             |           |
| Bacterial culture media                                                                             | 44 (30.6)                                   | reference |
| Sabouraud with gentamicin at 37°C                                                                   | 79 (54.9)                                   | <0.001    |
| Sabouraud with gentamicin at 30°C                                                                   | 72 (50.0)                                   | 0.03      |
| Inhibitory mold agar                                                                                | 72 (50.0)                                   | 0.001     |
| Brain heart infusion agar                                                                           | 69 (47.9)                                   | 0.003     |
| Combination of IMA, SDA, BHI†                                                                       | 116 (80.6)                                  | 0.001     |
| <i>Scedosporium</i> (20 positive samples)                                                           |                                             |           |
| Bacterial culture media                                                                             | 3 (15.0)                                    | reference |
| Sabouraud with gentamicin at 37°C                                                                   | 13 (65.0)                                   | 0.21      |
| Sabouraud with gentamicin at 30°C                                                                   | 20 (100)                                    | n/a       |
| Inhibitory mold agar                                                                                | 18 (90.0)                                   | 0.53      |
| Brain heart infusion agar                                                                           | 19 (95.0)                                   | 0.67      |
| Combination of IMA, SDA, BHI†                                                                       | 20 (100)                                    | n/a       |
| <i>Trichosporon</i> (17 positive samples)                                                           |                                             |           |
| Bacterial culture media                                                                             | 1 (5.9)                                     | Reference |
| Sabouraud with gentamicin at 37°C                                                                   | 16 (94.1)                                   | 0.80      |
| Sabouraud with gentamicin at 30°C                                                                   | 16 (94.1)                                   | 0.80      |
| Inhibitory mold agar                                                                                | 16 (94.1)                                   | 0.80      |
| Brain heart infusion agar                                                                           | 17 (100)                                    | n/a       |
| Combination of IMA, SDA, BHI†                                                                       | 17 (100)                                    | n/a       |
| <i>Exophiala</i> (23 samples)                                                                       |                                             |           |
| Bacterial culture media                                                                             | 0 (0)                                       | reference |
| Sabouraud with gentamicin at 37°C                                                                   | 3 (13.0)                                    | n/a       |
| Sabouraud with gentamicin at 30°C                                                                   | 12 (52.2)                                   | n/a       |
| Inhibitory mold agar                                                                                | 22 (95.7)                                   | n/a       |
| Brain heart infusion agar                                                                           | 11 (47.8)                                   | n/a       |
| Combination of IMA, SDA, BHI†                                                                       | 23 (100)                                    | n/a       |

†Combination include inhibitory mold agar, sabouraud dextrose agar with gentamicin in 30°C only, and brain heart infusion agar
